# Supplementary material
Source: Springer Nature journal article supplement (https://www.springermedizin.de/resource/supplementary/13002_2008_127_MOESM3_ESM.pdf/9627224)

Standard Error=0.1434

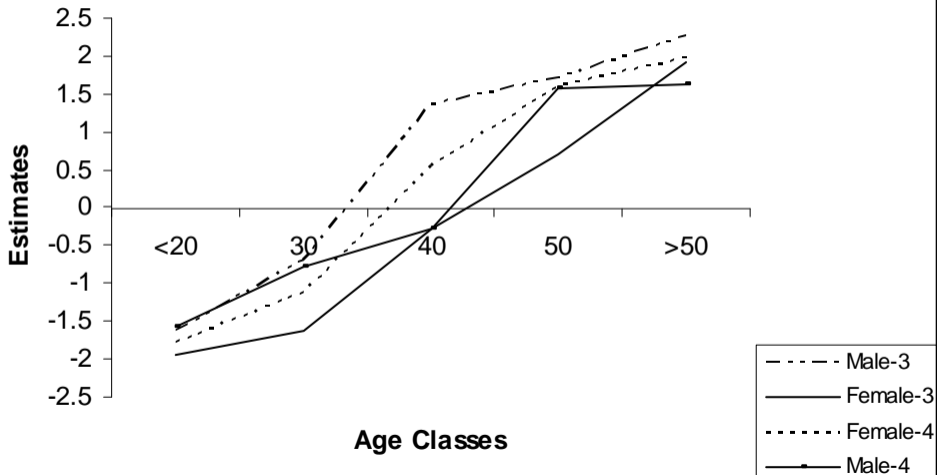

Supplement: MOESM3 [file 9627224]
